# Supplementary material for: Identification of Pathogenic Mutations and Investigation of the NOTCH Pathway Activation in Kartagener Syndrome
Source: Front Genet. 2019 Aug 22;10:749. doi: 10.3389/fgene.2019.00749 (PMC6713718; doi:10.3389/fgene.2019.00749)
Supplement: Supplementary file 2 [file Table_1.xlsx]

## Sheet: Table S1
Table S1. Candidate genes of PCD
Location	Gene name	Gene name((Aliases)	Omim	Ciliary structural defect
10p12.1-p11.23	ARMC4		615408	ODA defect
21q22.1	C21orf59		615494	ODA and IDA defect
17q21.31	CCDC103		614677	ODA and IDA defect
18q21.1	CCDC11		614759	No morphologic defects
19q13.32	CCDC114		615038	ODA defect
19q13.32	CCDC151		615956	ODA defect
2p23.3	CCDC164	DRC1	615288	Defects in assembly of the nexin-dynein regulatory complex structure; axonemal disorganization in small proportion of cilia
3q26.33	CCDC39		613798	IDA defect + microtubular disorganization
17q25.3	CCDC40		613799	IDA defect + microtubular disorganization
12q13.12	CCDC65	DRC2	611088	Mostly normal, central apparatus defects in small proportion of cilia
5q11.2	CCNO		607752	Ciliary aplasia, oligoplasia
16q24.1	DNAAF1	LRRC50	613190	ODA and IDA defect
14q21.3	DNAAF2	KTU	612517	ODA and IDA defect
19q13.42	DNAAF3	C19ORF51	614566	ODA and IDA defect
3p21.1	DNAH1		603332	Infertility, morphological abnormalities of the sperm flagella
7p21,7p15.3	DNAH11		603339	Normal axoneme ultrastructure,ODA defect in proximal region of respiratory cilia
5p15.2	DNAH5		603335	ODA defect
2p11.2	DNAH6		603336	Central pair defects
6p21.1	DNAH8		603337	ODA defect
9p21-p13.3	DNAI1		604366	ODA defect
17q25.1	DNAI2		605483	ODA defect
11q13.4	DNAJB13		610263	Central microtubules defect
14q24.3	DNAL1		610062	ODA defect
15q21.3	DYX1C1	DNAAF4	608706	ODA and IDA defect
7q36.1	GALNT11		615130	Situs inversus,essential balance between motile and immotile cilia,
16q24.3	GAS8		605178	Nexin-dynein regulatory complex defect
7p22.3	HEATR2	DNAAF5	614864	ODA and IDA defect
16q22.2	HYDIN		610812	Normal, very occasionally central apparatus defects
8q24.22	LRRC6		614930	ODA and IDA defect
5q11.2	MCIDAS		614086	Ciliary aplasia, oligoplasia
Xq22	OFD1		300170	Normal axoneme ultrastructure
Xq22.3	PIH1D3		300991	ODA and IDA defect
Xp21.1	RPGR		312610	Complex phenotype
21q22.3	RSPH1		609314	Mostly normal, central apparatus defects in small proportion of cilia
6q25.3	RSPH3		616481	Central pair defect or normal
6q22.1	RSPH4A		612649	Mostly normal, central apparatus defects in small proportion of cilia
6p21.1	RSPH9		612648	Mostly normal,central apparatus defects in small proportion of cilia
8q22.2	SPAG1		603395	ODA and IDA defect
2q35	STK36		607652	Radial spoke and central apparatus defect
20q13.12	STK4		604965	NA
17q21.2	TTC25		617092	ODA defect
7p14-p13	TXNDC3	NME8	607421	Partial ODA defect
3p21.31	ZMYND10		607070	ODA and IDA defect
ODA: outer dynein arm; IDA: inner dynein arm; NA: not available

## Sheet: Table S2
Table S2 Primers for real-time PCR
Gene	F Primer	R Primer
ADAM17	GTGGATGGTAAAAACGAAAGCG	GGCTAGAACCCTAGAGTCAGG
MYC	GGCTCCTGGCAAAAGGTCA	CTGCGTAGTTGTGCTGATGT
Cyclin D3	TACCCGCCATCCATGATCG	AGGCAGTCCACTTCAGTGC
p21	TGTCCGTCAGAACCCATGC	AAAGTCGAAGTTCCATCGCTC
HES1	TCAACACGACACCGGATAAAC	GCCGCGAGCTATCTTTCTTCA
NOTCH1	GAGGCGTGGCAGACTATGC	CTTGTACTCCGTCAGCGTGA

## Sheet: Table S3
Table S3. The PCD candidate genes overlapped SNVs of each KTS subjects(annovar)
Chr	Start	End	Ref	Alt	Func.refGene	Gene.refGene	KTS ID	Genotype	Segregation#	ExonicFunc.refGene	AAChange.refGene	ACMG InterVar Classification	ACMG Category	phastConsElements100way	genomicSuperDups	avsnp150	1000g2015aug_all	gnomAD_genome_ALL	gnomAD_genome_EAS	cg69	ExAC_ALL	ExAC_EAS	SIFT_score	SIFT_pred	Polyphen2_HDIV_score	Polyphen2_HDIV_pred	MutationTaster_score	MutationTaster_pred	CADD_raw	CADD_phred
chr16	84189298	84189298	C	T	exonic	DNAAF1	KT2	heterozygote	paternal	nonsynonymous SNV	DNAAF1:NM_178452:exon5:c.C685T:p.H229Y	Uncertain significance	PM1,PP5,BS1	Score=405;Name=lod=64	NA	rs35496754	0.00439297	0.001	0.0198	0.007	0.0021	0.0257	0.17	T	0.232	B	0.975	D	1.441	10.76
chr14	50092598	50092598	T	C	exonic	DNAAF2	KT2	heterozygote	paternal	nonsynonymous SNV	DNAAF2:NM_001083908:exon2:c.A2032G:p.T678A,DNAAF2:NM_018139:exon3:c.A2176G:p.T726A	Likely benign	BS1,BP4,BP6	NA	NA	rs80237479	0.00479233	0.002	0.0185	NA	0.0022	0.0241	0.87	T	0	B	1	N	-1.507	0.017
chr3	52396410	52396410	C	T	exonic	DNAH1	KT2	heterozygote	NO	nonsynonymous SNV	DNAH1:NM_015512:exon31:c.C4987T:p.R1663C	Likely benign	PM1,BS1,BP6	NA	NA	rs17052097	0.00539137	0.0022	0.0129	0.007	0.0068	0.0182	0	D	0.999	D	1	D	4.051	20.8
chr3	52429325	52429325	C	G	exonic	DNAH1	KT2	heterozygote	paternal	nonsynonymous SNV	DNAH1:NM_015512:exon69:c.C10970G:p.T3657R	Uncertain significance	PM1,PP3	Score=392;Name=lod=56	NA	rs144668102	0.00119808	0.0002	0.0037	NA	0.0003	0.0042	0.01	D	0.836	P	1	D	3.291	17.05
chr7	21621631	21621631	G	A	exonic	DNAH11	KT2	heterozygote	paternal	nonsynonymous SNV	DNAH11:NM_001277115:exon9:c.G1702A:p.A568T	benign	PM1,BS1	Score=490;Name=lod=151	NA	rs72655988	0.0379393	0.0418	0.0198	0.029	0.0415	0.0236	0.17	T	0.031	B	0.966	D	2.344	13.8
chr7	21641058	21641058	T	G	exonic	DNAH11	KT2	heterozygote	paternal	nonsynonymous SNV	DNAH11:NM_001277115:exon18:c.T3470G:p.L1157R	Uncertain significance	PM2	Score=370;Name=lod=45	NA	rs117830543	0.000199681	0.0001	0.0025	NA	0.0001	0.002	0	D	0.998	D	1	D	3.078	16.28
chr6	38840492	38840492	G	T	exonic	DNAH8	KT2	heterozygote	paternal	nonsynonymous SNV	DNAH8:NM_001206927:exon50:c.G7171T:p.A2391S	Likely benign	PM1,BS1,BP1,BP6	Score=354;Name=lod=38	NA	rs61758417	0.0479233	0.0098	0.1504	0.022	0.0256	0.1462	0.15	T	0.995	D	0	P	5.094	31
chr2	26667128	26667128	C	T	exonic	DRC1	KT2	heterozygote	paternal	nonsynonymous SNV	DRC1:NM_145038:exon9:c.C1067T:p.A356V	benign	BS1,BP1,BP6	NA	NA	rs78892546	0.033147	0.0077	0.0796	0.022	0.0154	0.0636	0.28	T	0.193	B	0.999	N	3.028	16.1
chr16	71220702	71220702	T	C	exonic	HYDIN	KT2	heterozygote	paternal	nonsynonymous SNV	HYDIN:NM_001198542:exon2:c.A178G:p.S60G,HYDIN:NM_001198543:exon2:c.A148G:p.S50G,HYDIN:NM_001270974:exon2:c.A97G:p.S33G,HYDIN:NM_017558:exon2:c.A97G:p.S33G	Uncertain significance	BS1	Score=437;Name=lod=88	NA	rs75357093	0.0159744	0.003	0.0457	0.014	0.0062	0.0487	0.22	T	0.43	B	1	N	1.407	10.64
chr17	78061565	78061565	G	A	exonic	CCDC40	LEI	heterozygote	maternal	nonsynonymous SNV	CCDC40:NM_001243342:exon15:c.G2609A:p.R870H,CCDC40:NM_017950:exon15:c.G2609A:p.R870H	Uncertain significance	PM1,PM2	Score=300;Name=lod=22	NA	rs373717036	NA	NA	NA	NA	5.804e-05	0.0002	0.02	D	0.938	P	1	D	2.214	13.36
chr17	78071197	78071197	C	T	exonic	CCDC40	LEI	heterozygote	maternal	stopgain	CCDC40:NM_017950:exon19:c.C3175T:p.R1059X	Pathogenic	PVS1,PM2,PP3	Score=363;Name=lod=42	NA	NA	NA	NA	NA	NA	NA	NA	1	T	.	.	1	D	6.052	37
chr16	84189298	84189298	C	T	exonic	DNAAF1	LEI	heterozygote	maternal	nonsynonymous SNV	DNAAF1:NM_178452:exon5:c.C685T:p.H229Y	Uncertain significance	PM1,PP5,BS1	Score=405;Name=lod=64	NA	rs35496754	0.00439297	0.001	0.0198	0.007	0.0021	0.0257	0.17	T	0.232	B	0.975	D	1.441	10.76
chr3	52429665	52429665	C	T	exonic	DNAH1	LEI	heterozygote	maternal	nonsynonymous SNV	DNAH1:NM_015512:exon70:c.C11230T:p.R3744C	Likely benign	PM1,BS1,BP6	Score=467;Name=lod=119	NA	rs419752	0.0299521	0.0339	0.0185	0.022	0.0381	0.0193	0	D	0.993	D	1	D	3.75	19.04
chr7	151797901	151797901	G	A	exonic	GALNT11	LEI	heterozygote	maternal	nonsynonymous SNV	GALNT11:NM_001304514:exon2:c.G71A:p.R24H,GALNT11:NM_022087:exon3:c.G314A:p.R105H	Uncertain significance	BS1	NA	NA	rs74427639	0.00658946	0.0023	0.0426	0.007	0.0035	0.0458	0.04	D	0.008	B	1	N	1.83	12.08
chr20	43629911	43629911	T	C	exonic	STK4	LEI	heterozygote	paternal	nonsynonymous SNV	STK4:NM_006282:exon9:c.T1064C:p.I355T	Likely benign	BS1,BP1,BP6	Score=462;Name=lod=114	NA	rs35944046	0.0127796	0.0032	0.06	0.014	0.0045	0.0581	0.07	T	0.165	B	1	D	3.751	19.04
chr3	52360191	52360191	C	T	exonic	DNAH1	KT1	heterozygote	paternal,brother	nonsynonymous SNV	DNAH1:NM_015512:exon4:c.C442T:p.R148C	Uncertain significance	PM2	NA	NA	NA	NA	NA	NA	NA	NA	NA	0.18	T	0.006	B	1	N	1.392	10.59
chr3	52387194	52387194	C	T	exonic	DNAH1	KT1	heterozygote	NO	nonsynonymous SNV	DNAH1:NM_015512:exon19:c.C3103T:p.R1035C	Uncertain significance	PM1	Score=492;Name=lod=154	NA	rs200988223	0.00139776	6.464e-05	0.0012	NA	0.0002	0.0024	0.03	D	0.999	D	1	D	4.536	24.5
chr9	34501139	34501139	T	G	exonic	DNAI1	KT1	heterozygote	paternal,sister	nonsynonymous SNV	DNAI1:NM_001281428:exon12:c.T1035G:p.N345K,DNAI1:NM_012144:exon12:c.T1023G:p.N341K	Uncertain significance	PM1,PM2	Score=481;Name=lod=138	NA	NA	NA	NA	NA	NA	NA	NA	0.01	D	0.993	D	1	D	3.763	19.11
chr17	72308221	72308221	C	T	exonic	DNAI2	KT1	heterozygote	brother	nonsynonymous SNV	DNAI2:NM_001172810:exon12:c.C1538T:p.A513V,DNAI2:NM_023036:exon12:c.C1574T:p.A525V	Likely benign	PP5,BP4	Score=354;Name=lod=38	NA	rs145602856	0.00139776	0.0005	0.0093	NA	0.0008	0.0086	0.26	T	0.007	B	1	D	2.466	14.21
chr8	133673819	133673819	-	A	exonic	LRRC6	KT1	homozygote	brother	frameshift insertion	LRRC6:NM_001321961:exon2:c.64dupT:p.S22fs,LRRC6:NM_012472:exon2:c.64dupT:p.S22fs			Score=514;Name=lod=192	NA	rs750425328	NA	NA	NA	NA	8.256e-06	0	NA	NA	NA	NA	NA	NA	NA	NA
chrX	38146295	38146295	C	T	exonic	RPGR	KT1	heterozygote	uncle	nonsynonymous SNV	RPGR:NM_001034853:exon15:c.G1957A:p.G653S	Likely benign	PM2,BP1,BP4	NA	NA	rs902148095	NA	NA	NA	NA	NA	NA	0.34	T	0.286	B	0.968	D	1.047	9.275
chr19	48800333	48800333	G	A	exonic	CCDC114	KT4	heterozygote	maternal	nonsynonymous SNV	CCDC114:NM_144577:exon14:c.C1913T:p.S638L	benign	BA1,BS1,BP1,BP4	NA	NA	rs74925056	0.0423323	0.0443	0.0253	0.029	0.0388	0.0349	0.09	T	0.026	B	1	N	1.128	9.599
chr3	52426507	52426507	G	C	exonic	DNAH1	KT4	heterozygote	maternal,paternal	nonsynonymous SNV	DNAH1:NM_015512:exon64:c.G10080C:p.Q3360H	Uncertain significance	BS1	Score=601;Name=lod=461	NA	rs116930509	0.00359425	0.0008	0.0136	0.007	0.0012	0.0152	0	D	0.999	D	0.992	D	2.77	15.22
chr5	13789010	13789010	A	G	exonic	DNAH5	KT4	heterozygote	maternal	nonsynonymous SNV	DNAH5:NM_001369:exon51:c.T8462C:p.L2821P	Uncertain significance	PM1,PM2,PP3	Score=470;Name=lod=123	NA	NA	NA	NA	NA	NA	NA	NA	0	D	1	D	1	D	3.118	16.42
chr5	13830706	13830706	C	G	exonic	DNAH5	KT4	heterozygote	paternal	nonsynonymous SNV	DNAH5:NM_001369:exon36:c.G6061C:p.G2021R	Uncertain significance	PM1,PM2,PP3	Score=507;Name=lod=179	NA	NA	NA	NA	NA	NA	NA	NA	.	.	1	D	1	D	4.681	25.9
chr7	151797901	151797901	G	A	exonic	GALNT11	KT4	heterozygote	maternal	nonsynonymous SNV	GALNT11:NM_001304514:exon2:c.G71A:p.R24H,GALNT11:NM_022087:exon3:c.G314A:p.R105H	Uncertain significance	BS1	NA	NA	rs74427639	0.00658946	0.0023	0.0426	0.007	0.0035	0.0458	0.04	D	0.008	B	1	N	1.83	12.08
chr16	71220702	71220702	T	C	exonic	HYDIN	KT4	heterozygote	maternal	nonsynonymous SNV	HYDIN:NM_001198542:exon2:c.A178G:p.S60G,HYDIN:NM_001198543:exon2:c.A148G:p.S50G,HYDIN:NM_001270974:exon2:c.A97G:p.S33G,HYDIN:NM_017558:exon2:c.A97G:p.S33G	Uncertain significance	BS1	Score=437;Name=lod=88	NA	rs75357093	0.0159744	0.003	0.0457	0.014	0.0062	0.0487	0.22	T	0.43	B	1	N	1.407	10.64
chr20	43629911	43629911	T	C	exonic	STK4	KT4	heterozygote	maternal,paternal	nonsynonymous SNV	STK4:NM_006282:exon9:c.T1064C:p.I355T	Likely benign	BS1,BP1,BP6	Score=462;Name=lod=114	NA	rs35944046	0.0127796	0.0032	0.06	0.014	0.0045	0.0581	0.07	T	0.165	B	1	D	3.751	19.04
chr17	78024067	78024067	G	A	exonic	CCDC40	KT5	heterozygote	NO	nonsynonymous SNV	CCDC40:NM_001243342:exon7:c.G1144A:p.E382K,CCDC40:NM_001330508:exon7:c.G1144A:p.E382K,CCDC40:NM_017950:exon7:c.G1144A:p.E382K	Likely benign	BS1,BP4,BP6	NA	NA	rs2289532	0.00459265	0.0006	0.0099	0.007	0.0025	0.0396	0.15	T	0.976	D	1	N	-0.327	2.448
chr3	52380653	52380653	C	T	exonic	DNAH1	KT5	heterozygote	maternal	stopgain	DNAH1:NM_015512:exon11:c.C1822T:p.Q608X	Pathogenic	PVS1,PM2,PP3	Score=579;Name=lod=372	NA	NA	NA	NA	NA	NA	NA	NA	0.3	T	.	.	1	A	8.543	41
chr7	21598500	21598500	A	G	exonic	DNAH11	KT5	heterozygote	NO	nonsynonymous SNV	DNAH11:NM_001277115:exon3:c.A576G:p.I192M	benign	BS1,BS2,BP6	Score=383;Name=lod=51	NA	rs72655972	0.0377396	0.0071	0.0644	0.043	0.0356	0.0841	0.24	T	0.664	P	0.938	N	2.566	14.54
chr5	13708284	13708284	C	T	exonic	DNAH5	KT5	heterozygote	maternal	nonsynonymous SNV	DNAH5:NM_001369:exon76:c.G13286A:p.R4429Q	benign	PM1,PP5,BS1,BS2	Score=290;Name=lod=20	NA	rs61744047	0.0145767	0.0023	0.0425	NA	0.0048	0.0374	0.08	T	0.403	B	1	D	4.062	20.9
chr5	13719018	13719018	G	A	exonic	DNAH5	KT5	heterozygote	maternal	nonsynonymous SNV	DNAH5:NM_001369:exon72:c.C12472T:p.R4158W	benign	PM1,BS1,BS2,BP6	Score=447;Name=lod=98	NA	rs3756672	0.0129792	0.0023	0.0425	NA	0.0042	0.0351	0	D	1	D	0.998	D	3.845	19.53
chr6	38840492	38840492	G	T	exonic	DNAH8	KT5	heterozygote	NO	nonsynonymous SNV	DNAH8:NM_001206927:exon50:c.G7171T:p.A2391S	Likely benign	PM1,BS1,BP1,BP6	Score=354;Name=lod=38	NA	rs61758417	0.0479233	0.0098	0.1504	0.022	0.0256	0.1462	0.15	T	0.995	D	0	P	5.094	31
chr7	151797901	151797901	G	A	exonic	GALNT11	KT5	heterozygote	NO	nonsynonymous SNV	GALNT11:NM_001304514:exon2:c.G71A:p.R24H,GALNT11:NM_022087:exon3:c.G314A:p.R105H	Uncertain significance	BS1	NA	NA	rs74427639	0.00658946	0.0023	0.0426	0.007	0.0035	0.0458	0.04	D	0.008	B	1	N	1.83	12.08
chr2	219553468	219553468	C	T	exonic	STK36	KT5	heterozygote	maternal	nonsynonymous SNV	STK36:NM_001243313:exon12:c.C1429T:p.R477W,STK36:NM_015690:exon12:c.C1429T:p.R477W	Uncertain significance	PM1,BS1	Score=351;Name=lod=37	NA	rs16859180	0.0477236	0.0427	0.0778	0.022	0.0493	0.0774	0	D	1	D	1	D	4.65	25.6
chr20	43629911	43629911	T	C	exonic	STK4	KT5	heterozygote	NO	nonsynonymous SNV	STK4:NM_006282:exon9:c.T1064C:p.I355T	Likely benign	BS1,BP1,BP6	Score=462;Name=lod=114	NA	rs35944046	0.0127796	0.0032	0.06	0.014	0.0045	0.0581	0.07	T	0.165	B	1	D	3.751	19.04
								#The variants carrier. NO: no carrier in control subjects.
								Control subjects	father of KT2
									father and monther of LEI
									father,sister,borther,uncle of KT1
									father and monther of KT4
									monther of KT5
